# Mind blanking is associated with a rigid spatio-temporal profile in typical wakefulness

**Sepehr Mortaheb<sup>1,2</sup>, Manousos A. Klados<sup>3</sup>, Laurens Van Calster<sup>4,5</sup>, Paradeisios Alexandros Boulakis<sup>1</sup>, Kleio Georgoula<sup>1</sup>, Steve Majerus<sup>2,4,5</sup>, and Athena Demertzi<sup>1,2,4,5\*</sup>**

<sup>1</sup>Physiology of Cognition Lab, GIGA-Consciousness, University of Liège, Liège, Belgium

<sup>2</sup>Fund for Scientific Research FNRS, Brussels, Belgium

<sup>3</sup>Department of Psychology, CITY College, University of York Europe Campus, Thessaloniki, Greece

<sup>4</sup>Psychology and Neuroscience of Cognition Research Unit, University of Liège, Liège, Belgium

<sup>5</sup>GIGA-Cyclotron Research Center In Vivo Imaging, University of Liège, Liège, Belgium

\*Corresponding Author: Athena Demertzi

Email: [a.demertzi@uliege.be](mailto:a.demertzi@uliege.be)

Address: Physiology of Cognition Lab, GIGA-Consciousness, GIGA Research Institute B43, Avenue de l'Hôpital 11, 4000 Liège, Belgium

## 1 **Abstract**

2 Mind-blanking (MB) is the inability to report mental contents, challenging the view of a constantly thought-oriented mind  
3 during wakefulness. Using fMRI experience-sampling we show that MB is reported scarcely, fast, and has low transitional  
4 dynamics, pointing to its role as a transient mental relay. MB's cerebral profile is linked to an overall positive connectivity  
5 pattern, bearing great resemblance to neural configurations observed in local sleeps, possibly reflecting neuronal silencing  
6 during wakefulness. We also find less efficient information flow between the default mode (DMN) and other networks before  
7 reporting MB. The DMN-salience network segregation was further able to classify MB from other reports in fewer steps,  
8 suggestive of an early saliency evaluation of contentless phenomenology along the neurocognitive hierarchy. Collectively,  
9 MB's unique neurofunctional profile among thought-oriented reports supports the view of instantaneous mental absences  
10 happening during wakefulness, paving the way for more mechanistic investigations of this particular phenomenology during  
11 ongoing mentation.

## 12 **1 Introduction**

13 During spontaneous thinking we tend to traverse different mental states which recruit the activity of multiple neural systems<sup>1</sup>.  
14 What is interesting is that, apart from entertaining specific thoughts, there are moments when our minds go nowhere, giving the  
15 impression that we are empty of mental content. These phenomenological occurrences are known as content-free awareness<sup>2</sup> or  
16 mind blanking (MB)<sup>3</sup>. What is the position of MB among other mental states during ongoing thinking, and how does the brain  
17 configure to support this empty-mind phenomenology?

18 Behavioral studies indicate that MB happens scarcely during everyday functioning, yet with a considerable frequency. It  
19 has been shown, for example, that during focused tasks, MB was reported on average 14.5% of the time whenever subjects  
20 were requested to provide a mental evaluation<sup>3</sup>, and 18% of the time when participants reported MB by self-catching<sup>4</sup>. MB was  
21 also observed in the form of attentional lapses, when participants were engaged in task performance<sup>5-7</sup>. In terms of neural  
22 underpinnings, there was evidence for reduced fMRI functional connectivity between the default mode network (DMN) and  
23 frontal, visual, and salience networks when participants were instructed to "think of nothing" as compared to "let your mind  
24 wander"<sup>8</sup>. MB was also associated with deactivation of Broca's area and parts of the hippocampus, as well as with activation  
25 of the anterior cingulate cortex, which was interpreted as reduced inner speech<sup>9</sup>. Decreased functional connectivity in the  
26 posterior regions of the DMN and increased connectivity in the dorsal attentional network were also found in an experienced  
27 meditator practicing content-minimized awareness<sup>2</sup>. Collectively, these studies indicate that the investigation of MB is rising  
28 over the years. Yet, MB so far has been induced, therefore the estimation of its occurrences across time can be biased. Also,  
29 MB has been examined in highly-trained individuals, like experienced meditators, therefore limiting the generalizability of its  
30 occurrences in typical participants. Finally, the neural substrates associated with MB concern a limited number of brain regions,  
31 leaving the whole-brain functional connectome uncharted.

32 The importance of a comprehensive characterization of MB rests on the fact that MB challenges the view of a primarily  
33 thought-oriented mind, which traverses stimulus-dependent and stimulus-independent thoughts<sup>10</sup>. Mind states which are  
34 thought-oriented indeed prevail during wakeful mentation and are characterized by rich spatio-temporal dynamics at the  
35 brain level<sup>11</sup>. Inversely, less complex neural architectures of highly segregated organization and less metastable dynamics are  
36 linked to the inability to report subjective experience as seen in sleep<sup>12</sup>, anesthetized primates<sup>13</sup>, typical individuals under  
37 anesthesia<sup>14</sup>, and in vegetative/unresponsive patients<sup>15</sup>. Several theoretical models concur that the reason we cannot report  
38 in such a segregated state is because the brain is unable to combine divergent signals and distribute them widely so that they  
39 become reportable<sup>16,17</sup>. These theoretical frameworks further hold that the inability to report mental contents can also happen  
40 in a brain state with extreme functional integration. In this scenario, an abnormally large number of regions work in synchrony,  
41 and, as a result, the brain becomes no longer capable of processing information in a way that leads to reportability, such as  
42 during generalized epilepsy<sup>18</sup> and local sleeps<sup>19</sup>. As both neural configurations can occur during ongoing mentation<sup>15</sup> and can  
43 be linked to the inability to report, the emerging question is which one would support the phenomenology of MB. To date, no  
44 empirical evidence favours one possibility over the other.

45 With the aim to delineate the neurofunctional profile of MB, we used fMRI-based experience-sampling in typical individu-  
46 als<sup>20</sup> in order to: a) account for a representative behavioral quantification of pure (no induction) MB occurrences in a dynamic  
47 way, b) determine MB's functional connectome at the whole-brain level, and c) estimate the brain's segregative/integrative  
48 organization whenever reporting MB occurrences.

## 49 Results

50 Data were acquired from 36 typical participants (27 females, 9 males, mean age:  $23y \pm 2.9$ ) within a 3T MRI scanner. Randomly  
51 presented auditory sounds ( $n=50$ ) prompted subjects to evaluate and report their mental content as it was prior the probe.  
52 Possible mental states were: i) MB, ii) perception of sensory stimuli without internal thoughts (Sens), iii) stimulus-dependent  
53 thoughts (SDep), and iv) stimulus-independent thoughts (SInd). With this setup, Rest periods and Response-type periods could  
54 be determined (Fig.1A).

### 55 Behavioral reports

56 We found that MB was reported significantly fewer times than any other mental state (median=2.5, IQR=3, min=0, max=9;  
57 Fig.2A). There was a main effect of mental state with respect to reaction times ( $\chi^2(3) = 66.63, p < 0.001$ ; generalized  
58 linear mixed model analysis with gamma distribution and inverse link function), with MB being reported faster than SDep  
59 ( $z = 3.81, p = 0.0008$ ) and SInd ( $z = 3.37, p = 0.0042$ ) but with no differences from Sens ( $z = -0.73, p = 0.89$ ; post-hoc  
60 Tukey test; Fig.2B). The evaluation of the dynamic transitions among different mental states showed exceptionally low, but  
61 equal probabilities (0.06) of reporting MB departing from a content-oriented state. Inversely, departures from MB towards  
62 content-oriented reports were characterized by high transition probabilities ( $>0.27$ ). Also, the probability to re-enter MB (i.e.  
63 reporting another MB immediately after a MB report) was particularly low (0.04, Fig.2C). Finally, the hypothesis for a uniform  
64 distribution of reports across the session could not be rejected either for MB ( $\chi^2(9) = 12.31, p = 0.20, \phi = 0.35$ ; Fig.2D) or  
65 for SDep ( $\chi^2(9) = 5.25, p = 0.81, \phi = 0.10$ ) and SInd ( $\chi^2(9) = 4.22, p = 0.90, \phi = 0.07$ ). However, Sens reports were not  
66 equally distributed over time ( $\chi^2(9) = 18.15, p = 0.03, \phi = 0.23$ ).

### 67 Brain patterns and neurofunctional analysis

68 By means of phase-based coherence connectivity analysis and k-means clustering, we determined four brain patterns which  
69 appeared recurrently across the rest periods (Fig.1B). The patterns were characterized by distinct signal configurations: a  
70 pattern of complex inter-areal interactions, containing positive and negative phase coherence values between long-range  
71 and short-range regions (Pattern 1), a pattern showing signal anti-correlations primarily between the visual network and the  
72 other networks (Pattern 2), a pattern with overall positive inter-areal phase coherence (Pattern 3), and a pattern of overall  
73 low inter-areal coherence (Pattern 4, Fig.3A). In terms of occurrences, Pattern 4 appeared at a significantly higher rate than  
74 Pattern 1 ( $t(35) = 6.23, p < 0.001$ , Cohen's  $d = 1.04$ ), Pattern 2 ( $t(35) = 5.27, p < 0.001$ , Cohen's  $d = 0.88$ ) and Pattern 3  
75 ( $t(35) = 5.50, p < 0.001$ , Cohen's  $d = 0.92$ , p-values are FDR corrected at  $\alpha = 0.05$ ; Fig.3B).



76 To determine which brain pattern was the closest to MB reports, we used the cosine distance as the similarity measure  
77 between five connectivity matrices preceding a report (i.e., Response-type periods) and the four brain patterns (Fig. 1C). Using  
78 a generalized linear mixed model fit to the distance measures of each brain pattern separately, we found a significant effect  
79 of mental state for distance values to Pattern 3 ( $\chi^2(3) = 15.47, p = 0.001$ ) and Pattern 4 ( $\chi^2(3) = 8.83, p = 0.032$ ). Pattern  
80 3 further showed higher similarity to MB compared to the reports about Sens (*Estimate* = 0.09,  $z = 2.71, p = 0.034$ ), SDep  
81 (*Estimate* = 0.11,  $z = 3.48, p = 0.003$ ), and SInd thoughts (*Estimate* = 0.12,  $z = 3.82, p < 0.001$ ; Post-hoc tukey tests, Fig.4).

## 82 Information flow analysis

83 To determine each mental state's integration/segregation profile, we used diffusion maps followed by mental state classification.  
84 Diffusion-map analysis is a non-linear dimensionality reduction technique based on spectral graph theory<sup>21</sup>. Applied to brain  
85 data, a larger distance in the diffusion values between regions indicates smaller between-region transition probabilities, which  
86 implies that information exchange is less efficient. For each mental state report, diffusion maps were calculated on the average of  
87 response-type connectivity matrices related to that state. We found that for MB, diffusion values have larger distances between  
88 regions of the DMN (red range values) and what is broadly defined as the salient network (blue range values). Furthermore,  
89 the diffusion value distance was smaller for content-oriented reports (Fig.5A). Using subjects' maps as feature vectors and  
90 applying a C4.5 decision tree classifier with a 10-fold cross validation scheme, mental state classification was achieved at an  
91 accuracy of 81.16% (Table1 and Table2). Based on the classifier's optimum decision tree and the brain regions' diffusion  
92 values, the somatomotor network was the region whose diffusion value separated MB from thought-oriented reports (Fig.5B).  
93 Subsequently, the final classification between thought-oriented reports (SDep vs. SInd) was achieved with the contribution of  
94 DMN prefrontal regions. Similarly, MB classification was achieved when the diffusion value was <0.6 in the left fronto-insular  
95 cortex (salience network). When the diffusion value in this region was higher, the decision between MB and Sens reports  
96 required more steps and the contribution of right parietal areas, bilateral visual, and left temporal cortices (Fig.5B).

## 97 Discussion

98 We investigated the neurofunctional profile of mind blanking (MB) and found that it occupies a unique position among  
99 thought-oriented reports during spontaneous mentation. By means of experience-sampling within the fMRI environment, we  
100 first show that typical individuals have few number of MB reports, which are reported faster than other mental states. These  
101 findings are in line with previous studies showing that MB gets reported significantly less often than thought-related content<sup>20</sup>.  
102 Our results are also in line with studies reporting similarly fast MB reaction times while participants are involved in sustained  
103 attention to response task<sup>7,22</sup>. Nevertheless, in other investigations MB is reported more slowly compared to other mental states,  
104 which is interpreted as MB facilitating sluggishness in responses<sup>23</sup> or as the result of decreases in alertness and arousal during  
105 task performance<sup>5</sup>. Here, we consider that the fast reaction times for MB and the longer reaction times for thought-oriented  
106 reports (SDep, SInd) might be attributed to an additional cognitive evaluation of the latter. In other words, when thoughts  
107 are occupied by content, they are translated in longer cognitive evaluation as to the particularities of their content. In that

108 respect, MB, being defined as content-free state, is reported faster. This interpretation supports previous investigations using  
109 self-paced focused reading with self-catches of MB and mind wandering, which tested how these mental modes affect reading  
110 comprehension<sup>3</sup>.

111 Regardless of this heterogeneity, it can be generally concluded that MB gets reported despite its content-less phenomenology.  
112 Therefore, MB can be considered as one more mental state which contributes to spontaneous mentation. Its role among the  
113 content-oriented states is here determined by the performed dynamic analysis. We show that the probabilities in reporting  
114 MB (after reporting another state) are low, but equal. At the same time, departures from MB are more likely to lead toward  
115 content-oriented thoughts, and less likely to lead towards MB again. Collectively, these results indicate that MB might not be  
116 driven by any specific mental content, therefore serving as a transient mental relay<sup>24</sup>. In other words, thoughts with content can  
117 lead towards more mental contents due to semantic associations, hence creating the perception of a stream of consciousness.  
118 Since MB is not semantically associated with any particular mental content, it does not occur frequently during spontaneous  
119 thinking. As such, phenomenologically content-less reports might have less of an anchoring effect than content-full reports.  
120 The eventual finding of a uniform distribution of MB reports over time, also reported elsewhere<sup>3,25</sup>, further suggests that MB is  
121 not a result of fatigue, and therefore confirms its unique place as a default mental state during spontaneous mentation.

122 By investigating whole-brain time-varying functional connectivity during the resting periods of the experience-sampling  
123 task, we show four distinct brain patterns occurring across time. These brain patterns bear great resemblance with what we  
124 previously reported as recurrent brain configurations during pure resting state fMRI acquisitions across healthy individuals  
125 and brain-injured patients<sup>15</sup>. The fact that these patterns appear across independent datasets, and that they are present also in  
126 non-human primates<sup>26</sup>, utilizing different paradigms and different brain parcellations, points to their universality and robustness.  
127 Our finding that Pattern 4 (low inter-areal connectivity) shows the highest occurrence probability in comparison to the other  
128 patterns, is explained by the fact that this configuration has the highest similarity to the underlying structural connectome<sup>15</sup>. As  
129 such, this pattern may act as a foundation upon which the others can occur, by showing divergence of function from structure,  
130 which is linked to mental flexibility<sup>27</sup>. On the other hand, an all-to-all positive inter-areal connectivity has the lowest occurrence  
131 probability and high similarity to the connectivity matrices preceding MB reports. This global inter-region positive connectivity  
132 has been previously reported to occur with high prevalence in NREM slow-wave sleep<sup>28,29</sup>. In this sleep stage, the brain's slow  
133 wave activity reflects minimal neuronal firing. Studies in rats<sup>19</sup> show that periods of neuronal silencing can happen also during  
134 wakefulness in the form of neuronal firing rate reduction leading to slow wave activity, which was indicative of local sleeps.  
135 When applied to humans, it has been argued that these instances of local sleeps can be the phenomenological counterpart  
136 of MB<sup>23</sup>. In that respect, wakefulness is not a physiological state of constantly on-periods of neuronal function. Rather, the  
137 fact that our brains show instances of neural down-states even during wakefulness possibly for homeostatic reasons<sup>30</sup>, can be  
138 neurally translated as global positive connectivity and phenomenologically interpreted as MB.

139 This possibility is further accounted by prominent theoretical models of conscious experience. The Global Neuronal  
140 Workspace Theory (GNWT)<sup>31</sup> posits that a stimulus becomes reportable when some of its locally processed information

141 becomes available to a wide range of brain regions, forming a balanced distributed network<sup>32</sup>. Therefore, the brain in a  
142 state of all-to-all positive connectivity provides not some, but all of its locally processed information globally so that, for  
143 a moment, no information is in a privileged state of processing and available to attention and awareness. This can also be  
144 similarly explained in the context of the supervisory attentional system (SAS)<sup>25</sup>, whose all "action systems" (i.e. processing  
145 structures associated with particular tasks) will have the same dominance, leaving the SAS unable to choose which one to  
146 bring into awareness. This lack of differentiation is also portrayed in the Integrated Information Theory (IIT<sup>16</sup>). According  
147 to this theory, to generate an experience a physical system must be able to discriminate among a large repertoire of states  
148 (i.e., information). This must be done as a single system that cannot be decomposed into a collection of causally independent  
149 parts (i.e., integration). The all-to-all positive connectivity pattern is characterized by the highest level of integration and  
150 efficiency and the lowest level of segregation and modularity compared to the other brain patterns<sup>15</sup>. Therefore, it is implied  
151 that such a neural configuration is unable to produce high values of integrated information, leading to limited experience. Here,  
152 information flow was approximated by the diffusion-map analysis. Before MB reports, we observed a large range of diffusion  
153 values between DMN and other areas, which is indicative of low between-node transition probabilities. Therefore, MB is linked  
154 to rigid and inefficient information exchange. Such inefficient information flow between the DMN and other networks has also  
155 been reported while participants were instructed to think of nothing<sup>8</sup>. Finally, with respect to the left fronto-insular area (part of  
156 the salience network), we found that this region predicted MB reports when it was highly segregated from the DMN early and  
157 in few steps during the classification scheme. The involvement of the salience network does not come as a surprise. Indeed, this  
158 system has been shown to play an important role in switching between the DMN and the central executive network (CEN),  
159 making salient and important stimuli available to the focus of attention<sup>33</sup>. Also recently, it is shown that prestimulus activity of  
160 anterior insula predicts the conscious perception of visual stimuli, so that this region might act as a gate for conscious access<sup>34</sup>.  
161 In a similar line, as MB is free of phenomenological content, it can be that its saliency evaluation happens effortlessly and early  
162 on during the neurocognitive hierarchy translated in a more lax inter-network engagement.

163 Our study is limited in several ways. First, the experience-sampling task utilized a probe-catching methodology. This means  
164 that participants were interrupted during spontaneous thinking by a probe, asking them to choose an appropriate report option to  
165 describe their thought-state. Such a probe-framing technique can restrict the estimation of potential phenomenological switches  
166 happening between the probes. Indeed, as the probes were appearing in pre-determined time points we cannot exclude the  
167 possibility of mental contents happening during the inter-probe intervals, and hence they were missed to be reported. Also,  
168 probe-framing can be suboptimal in capturing spontaneous thinking because it might lead to an inflated number of MB reports.  
169 This is because participants could choose this category since it was pre-established, which they could otherwise not report if they  
170 were to identify spontaneously<sup>35</sup>. The fact, though, that MB occurrences were not reported with a comparable high frequency  
171 to the content-oriented states might indicate that MB was evaluated in a representative way across the evaluation, leading to  
172 infrequent occurrences across participants. This small number of MB reports, in turn, could be considered problematic in  
173 terms of statistical inference. To address this issue, the analysis referred to data which were concatenated across subjects. This

174 technique on the one hand increased the number of MB reports in our statistical models. On the other hand, this solution might  
175 have influenced the between-subject variability, which was here mitigated by assuming subjects as random effects variable in  
176 the mixed effect analysis. Finally, the high TR during the fMRI acquisition (2.04s) could also echo the temporal implications of  
177 the MB profiling. By means of simultaneous EEG-fMRI recordings, more light is expected to be shed on fine-grained temporal  
178 dynamics of MB. Such simultaneous multi-modal recordings are expected to also illuminate the assumption of slow-wave  
179 activity as the corresponding neural mechanism of MB. In the absence of vigilance monitoring with EEG or pupil diameter, this  
180 hypothesis remains to be further tested.

181 In conclusion, our study suggests that MB can be considered as a default mental state occupying a unique position among  
182 content-oriented thoughts. Its rigid neurofunctional profile could account for the inability to report mental content due to the  
183 brain's inability to configure complex inter-areal dynamics. The DMN-salience network segregation which appears to lead  
184 towards MB reporting, paves the way to more mechanistic explorations of MB. Collectively, MB's unique neurofunctional  
185 profile among thought-oriented reports supports the view that instantaneous mental absences can happen during wakefulness,  
186 setting this mental state at a prominent phenomenological position during ongoing mentation.

## 187 **Methods**

### 188 **Participants**

189 Participants were healthy right-handed adults who were French speaking, university students or graduates with at least a high  
190 school diploma without psychiatric or neurological disorders. All subjects gave their written informed consent to take part in  
191 the experiment and ethics committee of the University Hospital of Liège approved the study.

### 192 **Experience-sampling task**

#### 193 ***Setup and procedure***

194 Participants were lying restfully in the scanner with eyes open. At random times, they were interrupted by an auditory tone,  
195 probing them to report their immediate mental state via button presses. The sampling probes were randomly distributed between  
196 30 and 60 seconds. Each probe started with the appearance of an exclamation mark lasting for 1000 ms inviting the participants  
197 to review and characterize the cognitive event(s) they just experienced. Several screens were presented in succession so  
198 participants could communicate their mental state type. The first screen offered four categories for a broad characterization  
199 of the cognitive experience: Absence, Perception, Stimulus-dependent thought, and Stimulus-independent thought. Absence  
200 was defined as mind blanking or empty state of mind. Perceptions represented the acknowledgment of a stimulus through  
201 one or more senses without any internal thought. Thoughts were distinguished as stimulus-dependent (i.e. with awareness of  
202 the immediate environment), or stimulus-independent (i.e. with no awareness of the immediate environment). For reporting,  
203 participants used two response boxes, one in each hand. Participants used an egocentric mental projection of their fingers onto  
204 the screen so that each finger corresponded to a specific mental category. Depending on the probes' trigger times and reaction  
205 times, the duration of the recording session was variable (48-58 min) across subjects. To minimize misclassification rates,

206 participants had a training session outside of the scanner at least 24 hours before the actual session.

### 207 **Behavioral statistical analysis**

208 Analyses were performed using locally developed codes in Python and R. Six paired t-tests were used to analyze the occurrence  
209 number of each mental state (p-values were FDR-corrected with a significance level of  $\alpha = 0.05$ ). A generalized linear mixed  
210 model with a gamma distribution and inverse link function tested the relationship between reaction times and mental states.  
211 Mental state reports were considered as fixed effects and participants were considered as the random effects with sex and age as  
212 confound variables. In case of significant main effects, post-hoc Tukey pairwise comparisons were applied. To model dynamic  
213 relationship between mind states, a Markov model was used to calculate the transition probabilities between participants'  
214 reports over the experiment. The uniformity of the distribution of each report over the acquisition duration was tested using  
215 the  $\chi^2$  test on the report times across all participants. The acquisition duration of each subject was divided into 10 equal time  
216 bins and number of reports at each bin was counted. To calculate the effect size of the  $\chi^2$  test,  $\phi$  measure was used ( $\phi = \sqrt{\frac{\chi^2}{n}}$ ,  
217 where  $n$  is the number of observations).

### 218 **Neuroimaging**

#### 219 **MRI acquisition**

220 Experiments were carried out on a 3-T head-only scanner (Magnetom Allegra, Siemens Medical Solutions, Erlangen, Germany)  
221 operated with the standard transmit–receive quadrature head coil. fMRI data were acquired using a T2\*-weighted gradient-echo  
222 EPI sequence with the following parameters: repetition time (TR) = 2040 msec, echo time (TE) = 30 msec, field of view  
223 (FOV) =  $192 \times 192 \text{ mm}^2$ ,  $64 \times 64$  matrix, 34 axial slices with 3 mm thickness and 25% interslice gap to cover most of the  
224 brain. The three initial volumes were discarded to avoid T1 saturation effects. Field maps were generated from a double echo  
225 gradient-recalled sequence (TR = 517 msec, TE = 4.92 and 7.38 msec, FOV =  $230 \times 230 \text{ mm}^2$ ,  $64 \times 64$  matrix, 34 transverse  
226 slices with 3 mm thickness and 25% gap, flip angle =  $90^\circ$ , bandwidth = 260 Hz/pixel) and used to correct echo-planar images  
227 for geometric distortion because of field inhomogeneities. A high-resolution T1-weighted MP-RAGE image was acquired  
228 for anatomical reference (TR = 1960 msec, TE = 4.4 msec, inversion time = 1100 msec, FOV =  $230 \times 173 \text{ mm}$ , matrix size  
229 =  $256 \times 192 \times 176$ , voxel size =  $0.9 \times 0.9 \times 0.9 \text{ mm}$ ). The participant's head was restrained using a vacuum cushion to  
230 minimize head movement. Stimuli were displayed on a screen positioned at the rear of the scanner, which the participant could  
231 comfortably see using a head coil mounted mirror.

#### 232 **Preprocessing**

233 Preprocessing and denoising were performed using a locally developed, freely available online, pipeline written in Python  
234 (nipyne package<sup>36</sup>) encompassing toolboxes from Statistical Parametric Mapping 12<sup>37</sup>, FSL 6.0<sup>38</sup>, AFNI<sup>39</sup>, and ART ([http://](http://web.mit.edu/swg/software.htm)  
235 [web.mit.edu/swg/software.htm](http://web.mit.edu/swg/software.htm); [https://gitlab.uliege.be/S.Mortaheb/mind\\_blanking/](https://gitlab.uliege.be/S.Mortaheb/mind_blanking/)). All  
236 the functional volumes were realigned to the first volume and then, in a second pass, to their average. Estimated motion  
237 parameters were then used for artifact detection using ART toolbox. An image was defined as an outlier or artifact image if the

238 head displacement in the x, y, or z direction was greater than 3 mm from the previous frame, if the rotational displacement was  
239 greater than 0.05 rad from the previous frame, or if the global mean intensity in the image was greater than 3 SDs from the  
240 mean image intensity for the entire scans. After skull-stripping of structural data (using FSL BET<sup>40</sup> with fractional intensity  
241 of 0.3), realigned functional images were registered to the bias-corrected structural image in the subject space (rigid-body  
242 transformation with normalized mutual information cost function). After extracting white matter (WM), grey matter (GM), and  
243 cerebrospinal fluid (CSF) masks, all the data and masks were transformed into the standard stereotaxic Montreal Neurological  
244 Institute (MNI) space (MNI152 with 2 mm resolution). WM and CSF masks were further eroded by one voxel. For noise  
245 reduction, we modeled the influence of noise as a voxel specific linear combination of multiple empirically estimated noise  
246 sources by deriving the first five principal components from WM and CSF masked functional data separately. These nuisance  
247 regressors together with detected outlier volumes, motion parameters and their first-order derivative were used to create a design  
248 matrix in the first-level general linear model (GLM). After smoothing the functional data using a Gaussian kernel of 6-mm full  
249 width at half-maximum, the designed GLM was fitted to the data. Before applying GLM, functional data were demeaned and  
250 detrended and all the motion-related and tissue-based regressors were first normalized and then demeaned and detrended using  
251 the approach explained in<sup>41</sup>. A temporal bandpass filter of 0.008 to 0.09 Hz was then applied on the residuals of the model  
252 to extract low frequency fluctuations of the BOLD signal. Schaefer atlas<sup>42</sup> with 100 ROIs were then used to parcellate each  
253 individual brain. Average of voxel time series in each region was considered as the extracted ROI time series and were used for  
254 further analysis.

### 255 **Functional connectivity matrices**

We used the phase-based coherence to extract between-region connectivity patterns at each time point of the scanning sessions<sup>15</sup>. For each subject  $i$ , after z-normalization of time series at each region  $r$  (i.e.  $x_{i,r}(t)$ ), the instantaneous phase of each time series were calculated using Hilbert transform. However, in order to have a more accurate estimate of the instantaneous phase, a narrower bandpass filter was applied on the time series (Second order Butterworth filter in range [0.01-0.04] Hz), and then the Hilbert transform was applied on the time series as:

$$\hat{x}_{i,r}(t) = \frac{1}{\pi t} * x_{i,r}(t), \quad (1)$$

in which  $*$  indicates a convolution operator. Using this transformation, an analytical signal was produced for each regional time series as:

$$X_{i,r}^a(t) = x_{i,r}(t) + i\hat{x}_{i,r}(t). \quad (2)$$

From this analytical signal, the instantaneous phase of each time series can be estimated as:

$$\phi_{i,r}(t) = \angle X_{i,r}^a(t) = \tan^{-1}\left(\frac{\hat{x}_{i,r}(t)}{x_{i,r}(t)}\right). \quad (3)$$

After wrapping each instantaneous phase signal of  $\phi_{i,r}(t)$  to the  $[-\pi, \pi]$  interval and naming the obtained signal as  $\theta_{i,r}(t)$ , a connectivity measure for each pair of regions was calculated as the cosine of their phase difference. For example, the connectivity measure between regions  $r$  and  $s$  in subject  $i$  was defined as:

$$conn_{i,r,s}(t) \triangleq \cos(\theta_{i,r}(t) - \theta_{i,s}(t)). \quad (4)$$

By this definition, completely synchronized time series lead to have a connectivity value of 1, completely desynchronized time series produce a connectivity value of zero, and anti-correlated time series produce a connectivity measure of -1. Using this approach, a connectivity matrix of  $100 \times 100$  was created at each time point  $t$  of each subject  $i$  that we called it  $C_i(t)$ :

$$C_i(t) \triangleq [conn_{i,r,s}(t)]_{r,s}. \quad (5)$$

256 After collecting connectivity matrices of all time points of all participants, k-means clustering was applied on the matrices  
257 just related to the resting parts of the experiment. With this technique, four robust and reproducible patterns were extracted as  
258 the centroids of the clusters and each resting connectivity matrix was assigned to one of the extracted patterns. The occurrence  
259 rate of each pattern was simply calculated by counting the number of matrices which were assigned to each specific pattern at  
260 each subject separately. Significant differences between patterns occurrence rates were analyzed using paired t-test and FDR  
261 correction of p-values over six possible pairwise comparisons.

### 262 **Neurofunctional analysis**

To evaluate the similarity between mental states' functional connectivity patterns and the four main resting state recurrent functional configurations, we extracted the five connectivity matrices preceding each probe (as the functional repertoire of each specific mental state) and then calculated their cosine distance to the four main resting state patterns. Cosine distance between two sample matrices of  $A$  and  $B$  can be calculated as:

$$dist(A, B) = \frac{Tr(A^T B)}{\sqrt{Tr(A^T A) Tr(B^T B)}}, \quad (6)$$

263 where  $Tr(\cdot)$  indicates trace of a matrix. Subsequently, for each mental state the distribution of distances to all four centroids  
264 were created. A generalized linear mixed effect model with gamma distribution and log link function was applied to test the  
265 relationship between the distances to each pattern and the mental states. In this model, mental state reports were considered as  
266 fixed effects and participants as random effects with sex and age as confound variables.

### 267 **Diffusion maps**

268 Diffusion-map analysis is a non-linear dimensionality reduction technique based on spectral graph theory<sup>21</sup> that checks the  
269 information flow between nodes based on the transition probabilities denoted by the connection weight between the nodes.  
270 The resulting diffusion map summarizes that the larger the distance in the diffusion values between regions, the smaller the



271 transition probability, which indicates less efficient information exchange.

272 To extract diffusion map of a sample connectivity matrix, the following steps were taken:

273

- 274 • For connectivity matrix  $W_{100 \times 100}$ , set all the negative weights to zero.
- 275 • Define a diagonal matrix (node strength)  $D_{100 \times 100}$ , such that  $D_{ii} = \sum_{j=1}^{100} W_{ij}$
- 276 • Create the transition probability matrix  $M_{100 \times 100}$ , such that  $M_{ij} = W_{ij}/D_{ii}$  (an asymmetric matrix denoting transition  
277 probability from region  $i$  to region  $j$ )
- 278 • Create a symmetric matrix  $M_s$  with the same eigenvalues as  $M$ :  $M_s = D^{1/2}MD^{-1/2}$
- 279 • Perform eigen decomposition on  $M_s$  to obtain its eigenvalues and corresponding orthonormal eigenvectors and sort them  
280 from the largest eigenvalue to the smallest.
- 281 • Take the first eigenvector as the main diffusion map of the connectivity matrix.

282 In this study, diffusion maps were estimated for the averaged connectivity matrices of each mental state. For the subsequent  
283 analysis, all the diffusion maps should also be aligned over the participants. Here, diffusion maps estimation and their alignment  
284 over participants have been performed using an open source package (<https://github.com/satra/mapalign>)<sup>43</sup>. As  
285 in this package, a singular value decomposition (SVD) technique is used to align the estimated diffusion maps, and SVD result  
286 is slightly different in various system configurations, we here report that in this study, diffusion map analysis were performed in  
287 a MacBook Pro 2018 TOUCH BAR MV962, processor Intel Core i5-8269U, using Python version 3.7.4 and Numpy version  
288 1.17.2.

### 289 ***Mental state classification***

290 Estimated diffusion maps were used as feature vectors and a C4.5 decision tree classifier<sup>44</sup> was used to classify mental states  
291 based on diffusion maps. This is a very efficient algorithm for representation of rule classification which locates the most  
292 robust features for the initial separation of the dataset, and then selects potential subtrees affected by noisy features, and  
293 prunes them. The pruned features are removed from the initial dataset and C4.5 re-runs since there is an improvement on  
294 the classification accuracy. In this study, the J48 (a Java implementation of C4.5 Classifier) decision tree, implemented in  
295 the Waikato Environment for Knowledge Analysis (WEKA)<sup>45</sup> was employed. The confidence factor (C) was set to 0.25 and  
296 the minimum number of instances per leaf (M) was set to 3. Classification accuracy was computed using the 10-fold cross  
297 validation strategy. According to this strategy, the dataset is divided into ten non-overlapping subsets (folds), where nine are  
298 used for training and one for testing. Accuracy is then defined as the ratio of the correctly classified instances divided by the  
299 total number of instances. To minimize the sampling bias, this procedure is repeated 10 times so each subset serves as a testing  
300 set and the model's overall accuracy is defined as the average of the 10 single-fold accuracies.



## 301 **Acknowledgements**

302 This work was supported by Belgian Fund for Scientific Research (FNRS). S.Mortaheb is a Research Fellow, A.Demertzi is a  
303 Research Associate, and S.Majerus is a Research Director at the FNRS. We also thank Mr Larry D. Fort for proof reading and  
304 editing the manuscript.

## 305 **Author contributions statement**

306 S.Mortaheb and A.D. conducted the research and wrote the manuscript. S.Mortaheb performed behavioral and neurofunctional  
307 data analysis. M.A.K. performed information flow analysis. P.A.B., K.G., and S.Mortaheb performed article review. L.V.C. and  
308 S.Majerus acquired the experience-sampling dataset. All authors reviewed the manuscript.

## 309 **Additional information**

310 **Accession codes:** All the codes used to generate results in this manuscript are accessible online via:

311 [https://gitlab.uliege.be/S.Mortaheb/mind\\_blanking](https://gitlab.uliege.be/S.Mortaheb/mind_blanking). The dataset used in the analysis is freely accessible via the OSF page of  
312 the project: <https://osf.io/gwrtc/>

313 **Competing interests:** The authors declare no competing interests.

## 314 References

- 315 1. Smallwood, J. *et al.* The neural correlates of ongoing conscious thought. *Isience* 102132 (2021).
- 316 2. Winter, U. *et al.* Content-free awareness: Eeg-fcmri correlates of consciousness as such in an expert meditator. *Front.*  
317 *Psychol.* **10** (2019).
- 318 3. Ward, A. F. & Wegner, D. M. Mind-blanking: When the mind goes away. *Front. psychology* **4**, 650 (2013).
- 319 4. Schooler, J. W. Zoning out while reading: Evidence for dissociations between experience and metaconsciousness jonathan  
320 w. schooler, erik d. reichle, and david v. halpern. *Think. seeing: Vis. metacognition adults children* **203** (2004).
- 321 5. Unsworth, N. & Robison, M. K. Pupillary correlates of lapses of sustained attention. *Cogn. Affect. & Behav. Neurosci.* **16**,  
322 601–615 (2016).
- 323 6. Van den Driessche, C. *et al.* Attentional lapses in attention-deficit/hyperactivity disorder: Blank rather than wandering  
324 thoughts. *Psychol. science* **28**, 1375–1386 (2017).
- 325 7. Stawarczyk, D., François, C., Wertz, J. & D’Argembeau, A. Drowsiness or mind-wandering? fluctuations in ocular  
326 parameters during attentional lapses. *Biol. Psychol.* **156**, 107950 (2020).
- 327 8. Kawagoe, T., Onoda, K. & Yamaguchi, S. Different pre-scanning instructions induce distinct psychological and resting  
328 brain states during functional magnetic resonance imaging. *Eur. J. Neurosci.* **47**, 77–82 (2018).
- 329 9. Kawagoe, T., Onoda, K. & Yamaguchi, S. The neural correlates of “mind blanking”: When the mind goes away. *Hum.*  
330 *brain mapping* **40**, 4934–4940 (2019).
- 331 10. Christoff, K., Irving, Z. C., Fox, K. C., Spreng, R. N. & Andrews-Hanna, J. R. Mind-wandering as spontaneous thought: A  
332 dynamic framework (2016).
- 333 11. Alavash, M., Thiel, C. M. & Gießing, C. Dynamic coupling of complex brain networks and dual-task behavior. *NeuroImage*  
334 **129**, 233–246 (2016).
- 335 12. Jobst, B. M. *et al.* Increased stability and breakdown of brain effective connectivity during slow-wave sleep: mechanistic  
336 insights from whole-brain computational modelling. *Sci. Reports* **7**, 1–16 (2017).
- 337 13. Barttfeld, P. *et al.* Signature of consciousness in the dynamics of resting-state brain activity. *Proc. Natl. Acad. Sci.* **112**,  
338 887–892 (2014). [arXiv:1408.1149](https://arxiv.org/abs/1408.1149).
- 339 14. Luppi, A. I. *et al.* Consciousness-specific dynamic interactions of brain integration and functional diversity. *Nat. Commun.*  
340 **10**, 1–12 (2019).
- 341 15. Demertzi, A. *et al.* Human consciousness is supported by dynamic complex patterns of brain signal coordination. *Sci.*  
342 *advances* **5**, eaat7603 (2019).
- 343 16. Tononi, G. Consciousness as integrated information: A provisional manifesto. *Biol. Bull.* **215**, 216–242 (2008).

- 344 **17.** Dehaene, S., Sergent, C. & Changeux, J.-P. A neuronal network model linking subjective reports and objective physiological  
345 data during conscious perception. *Proc. Natl. Acad. Sci.* **100**, 8520–5 (2003).
- 346 **18.** Blumenfeld, H. Impaired consciousness in epilepsy. *The Lancet Neurol.* **11**, 814–826 (2012). [NIHMS150003](#).
- 347 **19.** Vyazovskiy, V. V. *et al.* Local sleep in awake rats. *Nature* **472**, 443–447 (2011).
- 348 **20.** Van Calster, L., D’Argembeau, A., Salmon, E., Peters, F. & Majerus, S. Fluctuations of attentional networks and default  
349 mode network during the resting state reflect variations in cognitive states: evidence from a novel resting-state experience  
350 sampling method. *J. Cogn. Neurosci.* **29**, 95–113 (2017).
- 351 **21.** Coifman, R. R. *et al.* Geometric diffusions as a tool for harmonic analysis and structure definition of data: Diffusion maps.  
352 *Proc. national academy sciences* **102**, 7426–7431 (2005).
- 353 **22.** Stawarczyk, D. & D’Argembeau, A. Conjoint influence of mind-wandering and sleepiness on task performance. *J.*  
354 *experimental psychology: human perception performance* **42**, 1587 (2016).
- 355 **23.** Andrillon, T., Burns, A., MacKay, T., Windt, J. & Tsuchiya, N. Wandering minds, sleepy brains: lapses of attention and  
356 local sleep in wakefulness. *bioRxiv* (2020).
- 357 **24.** Fornito, A., Harrison, B. J., Zalesky, A. & Simons, J. S. Competitive and cooperative dynamics of large-scale brain  
358 functional networks supporting recollection. *Proc. Natl. Acad. Sci.* **109**, 12788–93 (2012).
- 359 **25.** Watts, F. N., MacLeod, A. K. & Morris, L. Associations between phenomenal and objective aspects of concentration  
360 problems in depressed patients. *Br. J. Psychol.* **79**, 241–250 (1988).
- 361 **26.** Barttfeld, P. *et al.* Signature of consciousness in the dynamics of resting-state brain activity. *Proc. Natl. Acad. Sci.* **112**,  
362 887–892 (2015).
- 363 **27.** Medaglia, J. D. *et al.* Functional alignment with anatomical networks is associated with cognitive flexibility. *Nat. Hum.*  
364 *Behav.* **2**, 156–164 (2018). [1611.08751](#).
- 365 **28.** Aedo-Jury, F., Schwalm, M., Hamzehpour, L. & Stroh, A. Brain states govern the spatio-temporal dynamics of resting-state  
366 functional connectivity. *Elife* **9**, e53186 (2020).
- 367 **29.** El-Baba, M. *et al.* Functional connectivity dynamics slow with descent from wakefulness to sleep. *PloS one* **14**, e0224669  
368 (2019).
- 369 **30.** Bridi, M. C. *et al.* Daily oscillation of the excitation-inhibition balance in visual cortical circuits. *Neuron* **105**, 621–629.e4  
370 (2020).
- 371 **31.** Dehaene, S., Changeux, J.-P., Naccache, L., Sackur, J. & Sergent, C. Conscious, preconscious, and subliminal processing:  
372 a testable taxonomy. *Trends Cogn. Sci.* **10**, 204–211 (2006).
- 373 **32.** Sergent, C. & Dehaene, S. Neural processes underlying conscious perception: experimental findings and a global neuronal  
374 workspace framework. *J. Physiol.* **98**, 374–384 (2004).

- 375 **33.** Menon, V. & Uddin, L. Q. Saliency, switching, attention and control: a network model of insula function. *Brain structure*  
376 *function* **214**, 655–667 (2010).
- 377 **34.** Huang, Z. *et al.* Anterior insula regulates brain network transitions that gate conscious access. *Cell Reports* **35**, 109081  
378 (2021).
- 379 **35.** Weinstein, Y., De Lima, H. J. & van der Zee, T. Are you mind-wandering, or is your mind on task? The effect of probe  
380 framing on mind-wandering reports. *Psychon. Bull. Rev.* **25**, 754–760 (2018).
- 381 **36.** Gorgolewski, K. *et al.* Nipype: a flexible, lightweight and extensible neuroimaging data processing framework in python.  
382 *Front. neuroinformatics* **5**, 13 (2011).
- 383 **37.** Penny, W. D., Friston, K. J., Ashburner, J. T., Kiebel, S. J. & Nichols, T. E. *Statistical parametric mapping: the analysis of*  
384 *functional brain images* (Elsevier, 2011).
- 385 **38.** Jenkinson, M., Beckmann, C. F., Behrens, T. E., Woolrich, M. W. & Smith, S. M. *Fsl. Neuroimage* **62**, 782–790 (2012).
- 386 **39.** Cox, R. W. Afni: software for analysis and visualization of functional magnetic resonance neuroimages. *Comput. Biomed.*  
387 *research* **29**, 162–173 (1996).
- 388 **40.** Smith, S. M. Fast robust automated brain extraction. *Hum. brain mapping* **17**, 143–155 (2002).
- 389 **41.** Power, J. D. *et al.* Methods to detect, characterize, and remove motion artifact in resting state fmri. *Neuroimage* **84**,  
390 320–341 (2014).
- 391 **42.** Schaefer, A. *et al.* Local-global parcellation of the human cerebral cortex from intrinsic functional connectivity mri. *Cereb.*  
392 *cortex* **28**, 3095–3114 (2018).
- 393 **43.** Langs, G., Golland, P. & Ghosh, S. S. Predicting activation across individuals with resting-state functional connectivity  
394 based multi-atlas label fusion. In *International Conference on Medical Image Computing and Computer-Assisted*  
395 *Intervention*, 313–320 (Springer, 2015).
- 396 **44.** Quinlan, J. R. *C4. 5: Programs for machine learning*. san francisco, ca, usa, 1993.
- 397 **45.** Frank, E., Hall, M. A. & Witten, I. H. *The WEKA workbench* (Morgan Kaufmann, 2016).

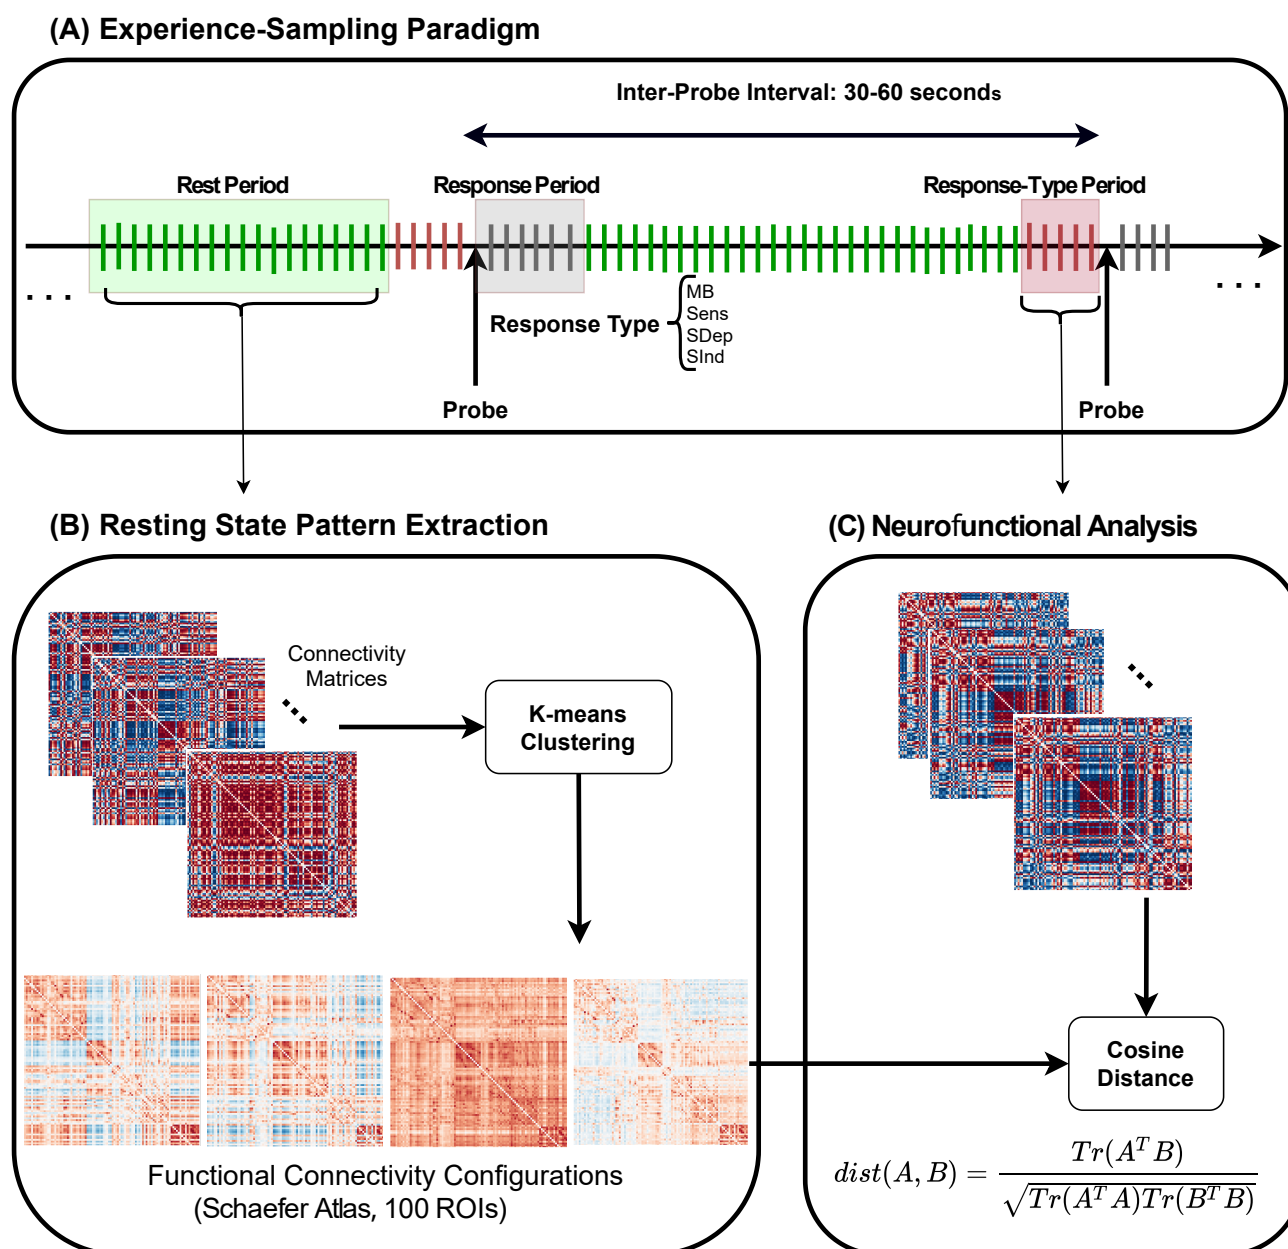

**Figure 1. Experience-sampling task and analysis pipeline.** (A) Participants' resting state was interrupted by auditory probes, inviting them to evaluate and report their mental state as this was before the probe, choosing among four pre-defined options (Response-types). (B) For brain pattern extraction, phase-based coherence was first used to estimate scan-wise connectivity matrices during the Rest Periods of the paradigm (green-shaded scans). Then, unsupervised machine learning with k-means estimated variant emerging signal configurations, which could recurrently appear across the acquisition. (C) To determine which brain pattern supported the reported mental states, a similarity measure was used, which compared the cosine distance between the five connectivity matrices preceding each report (red-shaded scans, Response-type periods) and the previously emerged brain patterns.

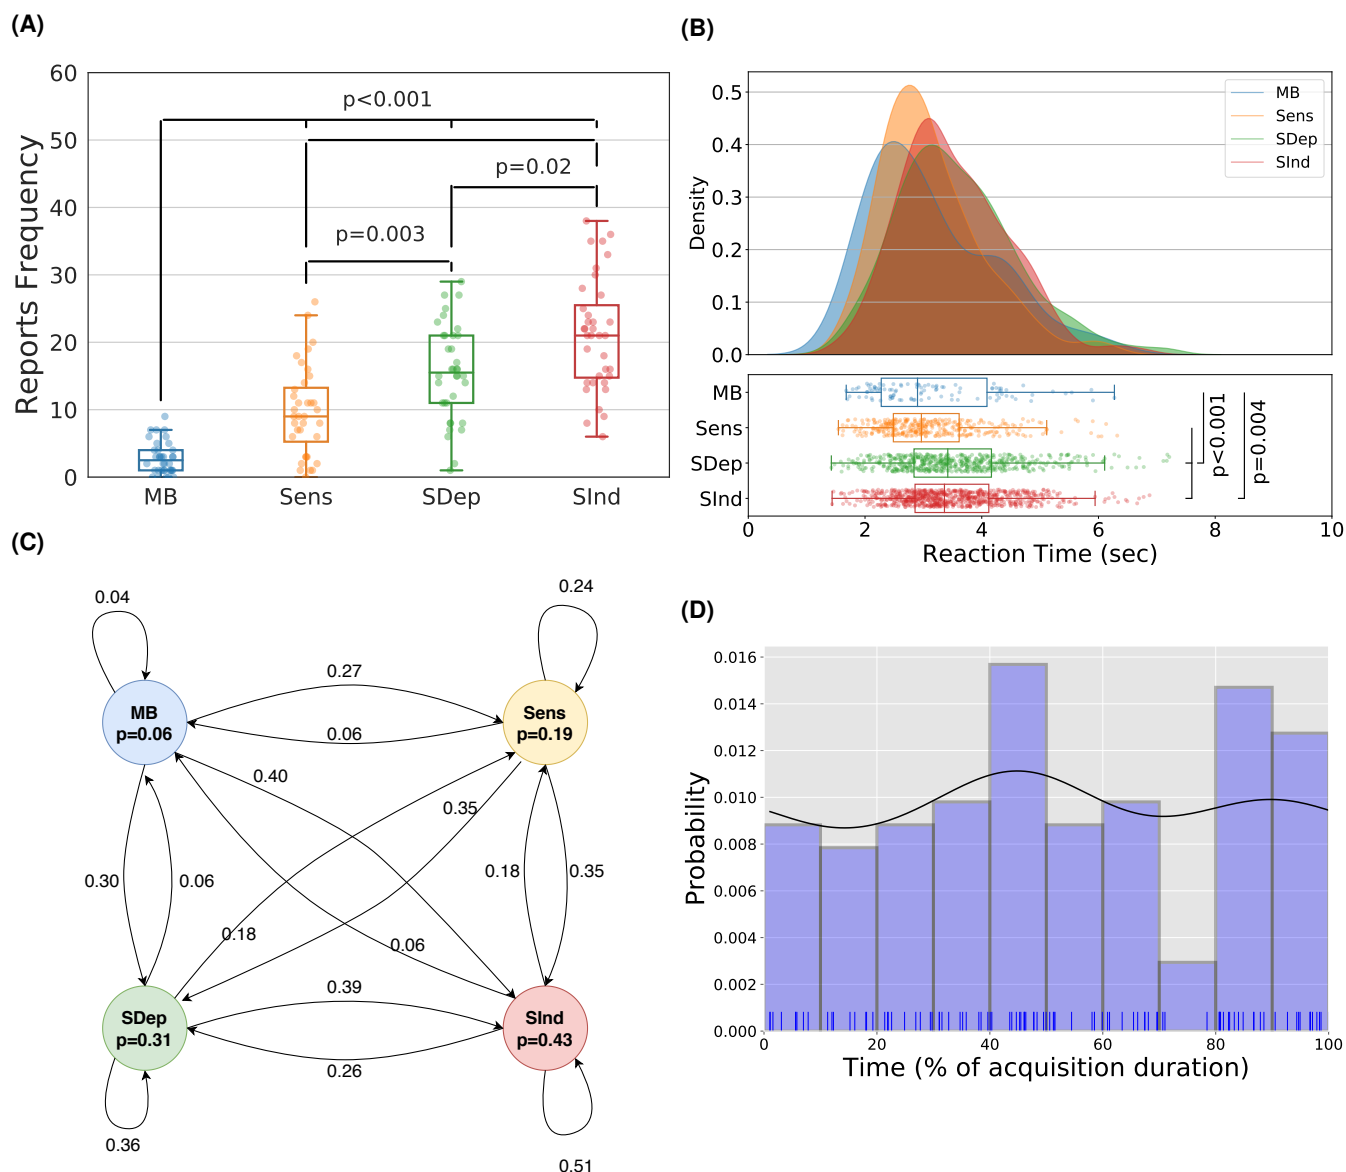

**Figure 2. Mind blanking occupies a unique position among content-oriented reports.** (A) Participants reported significantly fewer MB events than sensory-oriented (Sens), stimulus-dependent (SDep) and stimulus-independent (SInd) thoughts, confirming the less frequent yet non-negligible occurrence of MB across time (paired t-tests, FDR corrected at  $\alpha = 0.05$ ). (B) Thought-oriented reports (SDep, SInd) had longer reaction times than MB and sensory-related reports, potentially due to a second-level cognitive evaluation of mental content that stimulus-related thoughts necessitated before reporting (generalized linear mixed effect model, adjusted p-values at  $p < 0.05$ ). (C) The probability of reporting MB was low yet equal when departing from content-oriented states (markov chain modelling; numbers indicate transition probability matrix values). Also, the particularly low likelihood to re-enter MB indicates that MB might not be driven by specific mental content, hence serving as a transient mental relay. (D) The distribution of MB reports follows a uniform shape, indicating that MB occurrences spread equally over time and therefore may comprise a default mental state. Notes: catplots represent count, boxplots represent medians with interquartile range (25th-75th percentile), histogram with 10 bins related to the equal divisions of experiment duration to its 10% time slots.

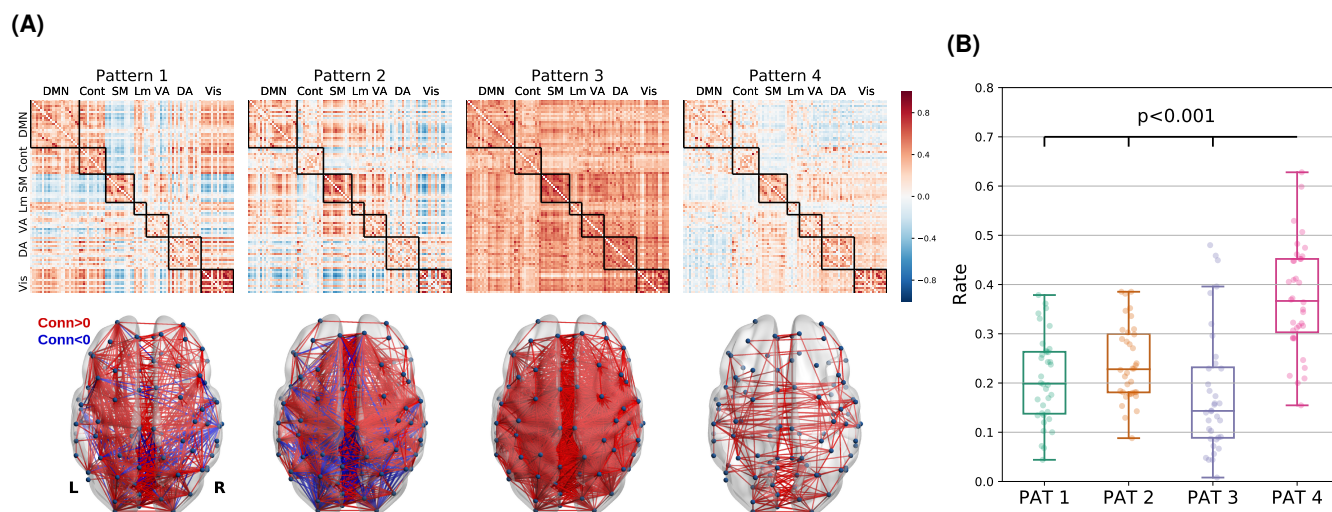

**Figure 3. Four distinct signal configurations were recurrently present across resting periods.** (A) Pattern 1 showed complex inter-areal functional configurations, characterized by short- and long-range connectivity, of positive and negative valence. Pattern 2 showed mainly functional anti-correlations between visual areas and regions of other networks. Pattern 3 showed all-to-all positive functional connectivity among the areas of the studied networks. Pattern 4 showed overall low inter-areal connectivity. (B) When estimating each pattern's occurrence rate, Pattern 4 had significantly the highest probability to appear across the resting periods while Pattern 3 had the lowest (paired t-tests, FDR corrected at  $\alpha = 0.05$ ). Brain regions are organized in networks as indicated by the Schaefer atlas; 100 regions (DMN: Default Mode Network, Cont: Executive Control Network, SM: Somatomotor, Lm: Limbic, VA: Ventral Attentional, DA: Dorsal Attentional, Vis: Visual). Colorbar indicates coherence values between any pair of regions.



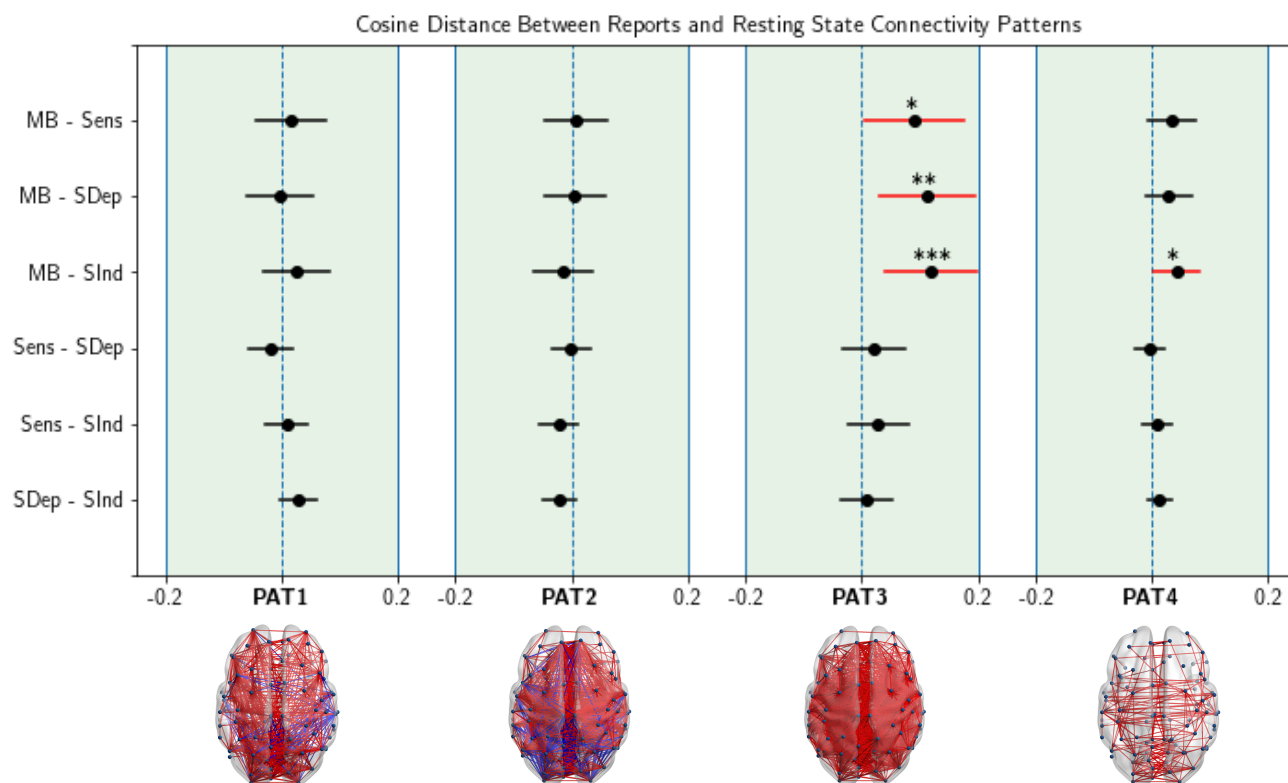

**Figure 4.** The positive all-to-all inter-areal connectivity pattern was the most similar configuration to MB reports. There was a significant effect of mental state on the distance values to Pattern 3 and Pattern 4. Post-hoc tukey test showed that MB had the highest similarity to Pattern 3 in comparison to all other mind states (error bars indicate asymptomatic confidence intervals around the difference estimate, \* $p < 0.05$ , \*\* $p < 0.01$ , \*\*\* $p < 0.001$ ).



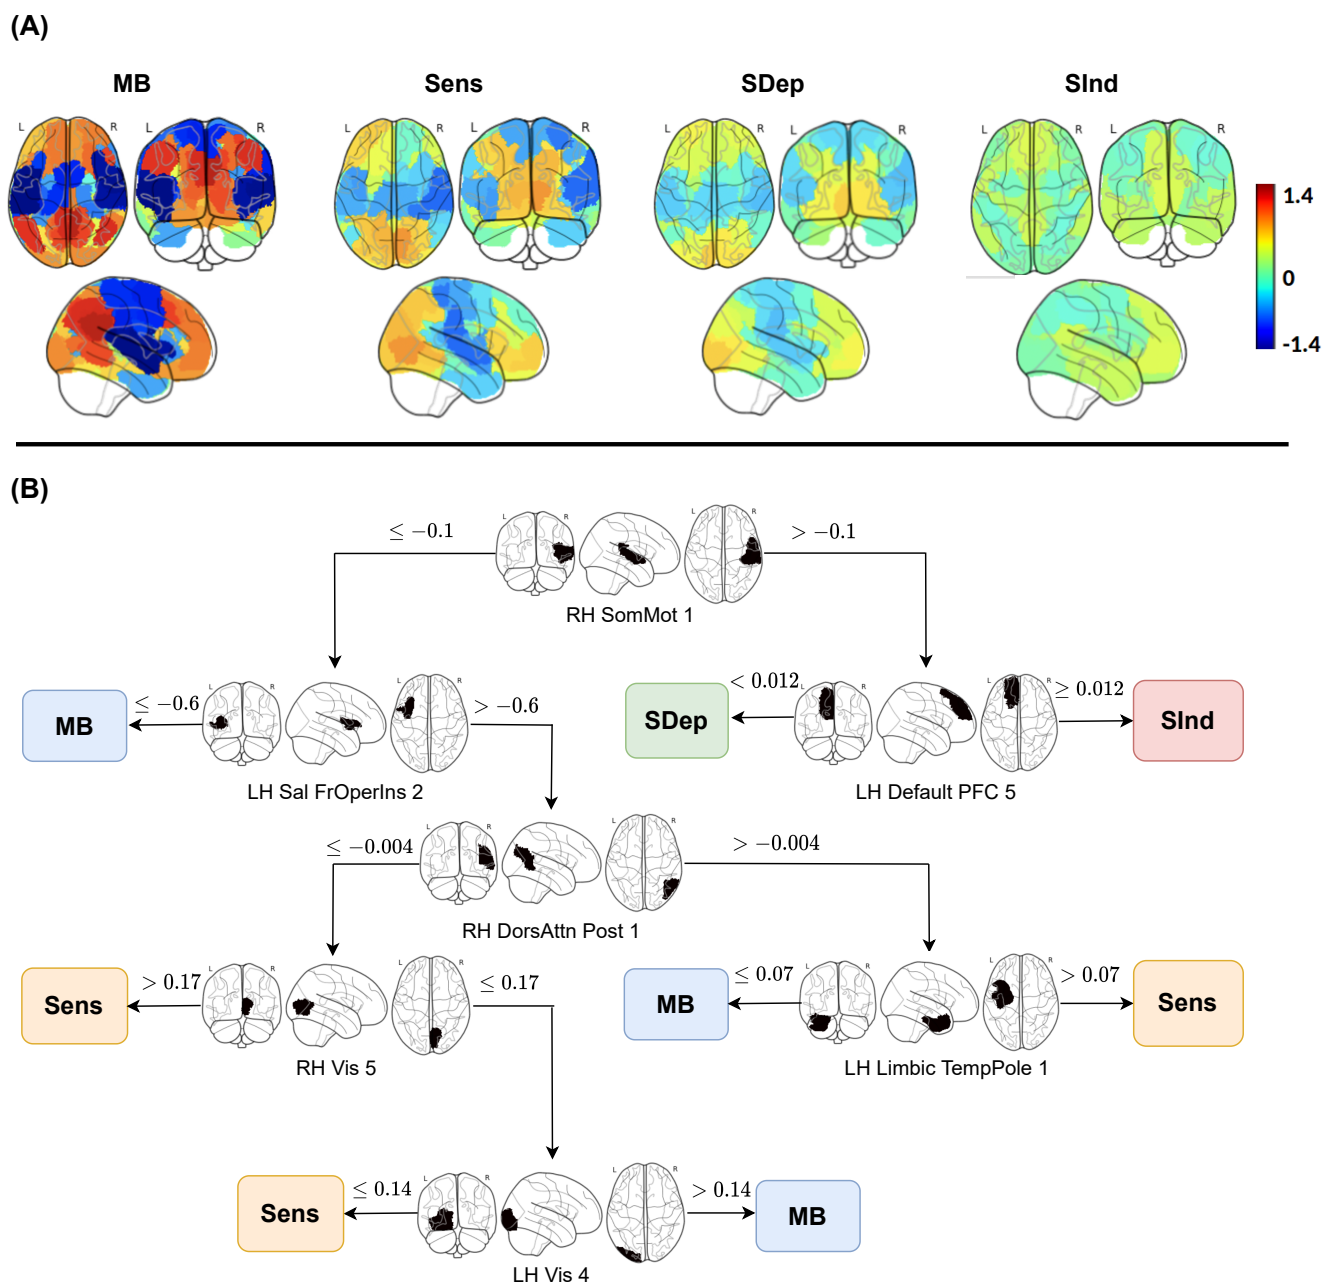

**Figure 5. Mind blanking is supported by a segregative brain profile, making it easily classifiable.** (A) Diffusion map analysis showed a large range in diffusion values for the periods preceding MB reports, leading to two main clusters broadly encompassing the salience network (blue-range cluster), and the DMN (red-range cluster). The identified small area-to-area transition probabilities indicate a less efficient information flow in MB in comparison to content-oriented states. Note: maps indicate averaged diffusion values across subjects, colorbar indicates z score. (B) Using the diffusion maps as feature vectors in a decision tree classification scheme, showed that the salience network (somatomotor and insular cortices) was able to classify MB by separating it from thought-related reports in fewer steps. Notes: the "less than" relational operator indicates higher resemblance of that cluster to the salience network (blue-range values); the "more than" relational operator indicates higher resemblance of that cluster to the DMN (red-range values).

**Table 1.** Confusion matrix of mental state classification using averaged diffusion maps for each mental state of each subject as feature vectors and C4.5 classifier

|          |             | Classified as |             |             |             |
|----------|-------------|---------------|-------------|-------------|-------------|
|          |             | <b>MB</b>     | <b>Sens</b> | <b>SDep</b> | <b>SInd</b> |
| Reported | <b>MB</b>   | 21            | 8           | 0           | 2           |
|          | <b>Sens</b> | 8             | 25          | 0           | 2           |
|          | <b>SDep</b> | 0             | 0           | 32          | 4           |
|          | <b>SInd</b> | 1             | 0           | 1           | 34          |

**Table 2.** Classifier performance in classification of each mental state. (FP: false positive, ROC: receiver operating characteristic, TP: true positive).

|             | <b>TP Rate</b> | <b>FP Rate</b> | <b>Precision</b> | <b>ROC Area</b> |
|-------------|----------------|----------------|------------------|-----------------|
| <b>MB</b>   | 0.677          | 0.084          | 0.700            | 0.838           |
| <b>Sens</b> | 0.714          | 0.078          | 0.758            | 0.813           |
| <b>SDep</b> | 0.889          | 0.010          | 0.970            | 0.947           |
| <b>SInd</b> | 0.944          | 0.078          | 0.810            | 0.917           |
